# Supplementary material for: Beruflich erworbene SARS-CoV-2-Infektionen bei medizinischem Personal in Frankfurt am Main von März bis August 2020
Source: Springer Nature journal article supplement (doi:10.1007/s00103-022-03521-2), 2022-04-06
Supplement: MOESM1 [file 20289846]

Onlinematerial zum Beitrag:

## **Beruflich erworbene SARS-CoV-2-Infektionen bei medizinischem Personal in Frankfurt am Main von März bis August 2020**

Anton Sundberg<sup>1,3</sup>, René Gottschalk<sup>1,2</sup>, Sabine Wicker<sup>3</sup>

<sup>1</sup> Gesundheitsamt, Frankfurt am Main, Deutschland

<sup>2</sup> Institut für Medizinische Virologie, Universitätsklinikum Frankfurt am Main, Frankfurt/Main, Deutschland

<sup>3</sup> Betriebsärztlicher Dienst, Universitätsklinikum Frankfurt am Main, Frankfurt/Main, Deutschland

### **Korrespondenzadresse**

Anton Sundberg  
Universitätsklinikum Frankfurt am Main  
Theodor-Stern-Kai 7  
60590 Frankfurt/Main  
Deutschland  
[anton.sundberg@stud.uni-frankfurt.de](mailto:anton.sundberg@stud.uni-frankfurt.de)

Inhalt:

**Tabelle Z1:** Arbeitsbedingungen des an der Querschnittsbefragung teilnehmenden medizinischen Personals, Frankfurt/Main, März - August 2020 (n = 178)

**Tabelle Z2:** SARS-CoV-2-Infektion und Diagnose bei dem an der Querschnittserhebung teilnehmenden medizinischen Personal, Frankfurt/Main, März - August 2020 (n = 178)

**Zusatztable Z1: Arbeitsbedingungen des an der Querschnittsbefragung teilnehmenden medizinischen Personals, Frankfurt/Main, März - August 2020 (n = 178)**

|                                                                | Ort des Infektionskontakts |                   |                    |                   |                       |                   |                        |                   | p-Wert  |
|----------------------------------------------------------------|----------------------------|-------------------|--------------------|-------------------|-----------------------|-------------------|------------------------|-------------------|---------|
|                                                                | Arbeitsplatz<br>(n = 84)   |                   | Privat<br>(n = 32) |                   | Unbekannt<br>(n = 62) |                   | Insgesamt<br>(n = 178) |                   |         |
|                                                                | n                          | %                 | n                  | %                 | n                     | %                 | n                      | %                 |         |
| <b>14 Tage vor der Infektion</b>                               |                            |                   |                    |                   |                       |                   |                        |                   | < 0,001 |
| Am Arbeitsplatz                                                | 80                         | 96,4 <sup>a</sup> | 21                 | 75,0 <sup>a</sup> | 48                    | 82,8 <sup>a</sup> | 149                    | 88,2 <sup>a</sup> | 0,003   |
| Nicht am Arbeitsplatz                                          | 3                          | 3,6 <sup>a</sup>  | 9                  | 32,1 <sup>a</sup> | 6                     | 10,3 <sup>a</sup> | 18                     | 10,7 <sup>a</sup> | < 0,001 |
| Urlaub                                                         | 2                          | 2,4 <sup>a</sup>  | 4                  | 14,3 <sup>a</sup> | 9                     | 15,5 <sup>a</sup> | 15                     | 8,9 <sup>a</sup>  | 0,015   |
| Insgesamt                                                      | 83                         | 98,8              | 28                 | 87,5              | 58                    | 93,5              | 169                    | 94,9              |         |
| <b>Arbeitsbelastung vor der Infektion</b>                      |                            |                   |                    |                   |                       |                   |                        |                   | 0,339   |
| Erhöht                                                         | 33                         | 41,8 <sup>a</sup> | 7                  | 26,9 <sup>a</sup> | 14                    | 25,9 <sup>a</sup> | 54                     | 34,0 <sup>a</sup> | 0,118   |
| Vermindert                                                     | 4                          | 5,1 <sup>a</sup>  | 1                  | 3,8 <sup>a</sup>  | 5                     | 9,3 <sup>a</sup>  | 10                     | 6,3 <sup>a</sup>  | 0,529   |
| Unverändert                                                    | 46                         | 58,2 <sup>a</sup> | 18                 | 69,2 <sup>a</sup> | 36                    | 66,7 <sup>a</sup> | 100                    | 62,9 <sup>a</sup> | 0,469   |
| Insgesamt                                                      | 79                         | 94,0              | 26                 | 81,3              | 54                    | 87,1              | 159                    | 89,3              |         |
| <b>Betriebliche Information und Aufklärung über SARS-CoV-2</b> |                            |                   |                    |                   |                       |                   |                        |                   | 0,031   |
| Ausreichend                                                    | 45                         | 56,3 <sup>a</sup> | 25                 | 80,6 <sup>a</sup> | 38                    | 69,1 <sup>a</sup> | 108                    | 65,1 <sup>a</sup> | 0,040   |
| Unzureichend                                                   | 26                         | 32,5 <sup>a</sup> | 5                  | 16,1 <sup>a</sup> | 11                    | 20,0 <sup>a</sup> | 42                     | 25,3 <sup>a</sup> | 0,111   |
| Auf weiterer Sprache gewünscht                                 | 5                          | 6,3 <sup>a</sup>  | 0                  | 0,0 <sup>a</sup>  | 0                     | 0,0 <sup>a</sup>  | 5                      | 3,0 <sup>a</sup>  | 0,063   |
| Insgesamt                                                      | 80                         | 95,2              | 31                 | 96,9              | 55                    | 88,7              | 166                    | 93,3              |         |
| <b>Infektionsschutzmaßnahmen</b>                               |                            |                   |                    |                   |                       |                   |                        |                   | 0,351   |

|                                                                  |    |                   |    |                   |    |                   |     |                   |         |
|------------------------------------------------------------------|----|-------------------|----|-------------------|----|-------------------|-----|-------------------|---------|
| Verpflichtender MNS <sup>b</sup> bei Kontakt mit Patient/-innen  | 57 | 70,4 <sup>a</sup> | 24 | 80,0 <sup>a</sup> | 41 | 68,3 <sup>a</sup> | 122 | 71,3 <sup>a</sup> | 0,500   |
| Allgemeine Pflicht zur Nutzung von MNS <sup>b</sup>              | 46 | 56,8 <sup>a</sup> | 19 | 63,3 <sup>a</sup> | 37 | 61,7 <sup>a</sup> | 102 | 59,6 <sup>a</sup> | 0,761   |
| Verpflichtende Anwendung von MNS <sup>b</sup> für Patient/-innen | 27 | 33,3 <sup>a</sup> | 15 | 50,0 <sup>a</sup> | 23 | 38,3 <sup>a</sup> | 65  | 38,0 <sup>a</sup> | 0,275   |
| Räumliche Unterteilung von Risikozonen                           | 27 | 33,3 <sup>a</sup> | 9  | 30,0 <sup>a</sup> | 21 | 35,0 <sup>a</sup> | 57  | 33,3 <sup>a</sup> | 0,894   |
| Isolierzimmer                                                    | 28 | 34,6 <sup>a</sup> | 12 | 40,0 <sup>a</sup> | 19 | 31,7 <sup>a</sup> | 59  | 34,5 <sup>a</sup> | 0,735   |
| Regelmäßiges Lüften                                              | 18 | 22,2 <sup>a</sup> | 20 | 66,7 <sup>a</sup> | 26 | 43,3 <sup>a</sup> | 64  | 37,4 <sup>a</sup> | < 0,001 |
| Regelmäßige Flächendesinfektion                                  | 40 | 49,4 <sup>a</sup> | 21 | 70,0 <sup>a</sup> | 44 | 73,3 <sup>a</sup> | 105 | 61,4 <sup>a</sup> | 0,009   |
| Keine der genannten                                              | 8  | 9,9 <sup>a</sup>  | 0  | 0,0 <sup>a</sup>  | 4  | 6,7 <sup>a</sup>  | 12  | 7,0 <sup>a</sup>  | 0,198   |
| Insgesamt                                                        | 81 | 96,4              | 30 | 93,8              | 60 | 96,8              | 171 | 96,1              |         |
| <b>Wahrgenommene Sicherheit am Arbeitsplatz</b>                  |    |                   |    |                   |    |                   |     |                   | < 0,001 |
| Ausreichend                                                      | 26 | 38,2 <sup>a</sup> | 21 | 75,0 <sup>a</sup> | 36 | 67,9 <sup>a</sup> | 83  | 55,7 <sup>a</sup> | < 0,001 |
| Unzureichend                                                     | 42 | 61,8 <sup>a</sup> | 7  | 25,0 <sup>a</sup> | 17 | 32,1 <sup>a</sup> | 66  | 44,3 <sup>a</sup> | < 0,001 |
| Insgesamt                                                        | 68 | 81,0              | 28 | 87,5              | 53 | 85,5              | 149 | 83,7              |         |

<sup>a</sup> berechnet auf Basis gültiger Antworten

<sup>b</sup> Mund-Nasen-Schutz

**Zusatztable Z2: SARS-CoV-2-Infektion und Diagnose bei dem an der Querschnitterhebung teilnehmenden medizinischen Personal, Frankfurt/Main, März - August 2020 (n = 178)**

|                                                                  | Ort des Infektionskontakts |                   |                    |                    |                       |                   | Insgesamt<br>(n = 178) |                   | p-Wert  |
|------------------------------------------------------------------|----------------------------|-------------------|--------------------|--------------------|-----------------------|-------------------|------------------------|-------------------|---------|
|                                                                  | Arbeitsplatz<br>(n = 84)   |                   | Privat<br>(n = 32) |                    | Unbekannt<br>(n = 62) |                   |                        |                   |         |
|                                                                  | n                          | %                 | n                  | %                  | n                     | %                 | n                      | %                 |         |
| <b>Anlass für PCR-Test</b>                                       |                            |                   |                    |                    |                       |                   |                        |                   | 0,015   |
| Status als Kontaktperson                                         | 27                         | 32,9 <sup>a</sup> | 13                 | 43,3 <sup>a</sup>  | 11                    | 19,0 <sup>a</sup> | 51                     | 30,0 <sup>a</sup> | 0,044   |
| Symptomatisch                                                    | 50                         | 61,0 <sup>a</sup> | 18                 | 60,0 <sup>a</sup>  | 38                    | 65,5 <sup>a</sup> | 106                    | 62,4 <sup>a</sup> | 0,825   |
| Keine Kontaktperson oder Symptome                                | 3                          | 3,7 <sup>a</sup>  | 3                  | 10,0 <sup>a</sup>  | 6                     | 10,3 <sup>°</sup> | 12                     | 7,1 <sup>a</sup>  | 0,247   |
| Durch Arbeitsstelle veranlasst                                   | 33                         | 40,2 <sup>a</sup> | 3                  | 10,0 <sup>a</sup>  | 9                     | 15,5 <sup>a</sup> | 45                     | 26,5 <sup>a</sup> | < 0,001 |
| Betriebliche Routine                                             | 6                          | 7,3 <sup>a</sup>  | 2                  | 6,7 <sup>a</sup>   | 6                     | 10,3 <sup>a</sup> | 14                     | 8,2 <sup>a</sup>  | 0,767   |
| Durch Gesundheitsamt                                             | 9                          | 11,0 <sup>a</sup> | 3                  | 10,0 <sup>a</sup>  | 2                     | 3,4 <sup>a</sup>  | 14                     | 8,2 <sup>a</sup>  | 0,260   |
| Insgesamt                                                        | 82                         | 97,6              | 30                 | 93,8               | 58                    | 93,5              | 170                    | 95,5              |         |
| <b>Anwesenheit am Arbeitsplatz zwischen Test und Ergebnis</b>    |                            |                   |                    |                    |                       |                   |                        |                   | 0,042   |
| Ja                                                               | 14                         | 17,5 <sup>a</sup> | 0                  | 0,0 <sup>a</sup>   | 7                     | 11,9 <sup>a</sup> | 21                     | 12,4 <sup>a</sup> | 0,042   |
| Nein                                                             | 66                         | 82,5 <sup>a</sup> | 31                 | 100,0 <sup>a</sup> | 52                    | 88,1 <sup>a</sup> | 149                    | 87,6 <sup>a</sup> | 0,042   |
| Insgesamt                                                        | 80                         | 95,2              | 31                 | 96,9               | 59                    | 95,2              | 170                    | 95,5              |         |
| <b>Status als Kontaktperson in den 14 Tagen vor der Diagnose</b> |                            |                   |                    |                    |                       |                   |                        |                   | 0,026   |
| Ja, durch Gesundheitsamt kontaktiert                             | 31                         | 38,8 <sup>a</sup> | 11                 | 36,7 <sup>a</sup>  | 10                    | 17,2 <sup>a</sup> | 52                     | 31,0 <sup>a</sup> | 0,020   |
| Ja, durch Gesundheitsamt Quarantäne angeordnet                   | 18                         | 22,5 <sup>a</sup> | 9                  | 30,0 <sup>a</sup>  | 7                     | 12,1 <sup>a</sup> | 34                     | 20,2 <sup>a</sup> | 0,110   |
| Keine Kontaktaufnahme durch Gesundheitsamt vor Diagnose          | 49                         | 61,3 <sup>a</sup> | 19                 | 63,3 <sup>a</sup>  | 48                    | 82,8 <sup>a</sup> | 116                    | 69,0 <sup>a</sup> | 0,020   |
| Insgesamt                                                        | 80                         | 95,2              | 30                 | 93,8               | 58                    | 93,5              | 168                    | 94,4              |         |
| <b>Dauer der Erkrankung</b>                                      |                            |                   |                    |                    |                       |                   |                        |                   | 0,538   |

|                                                             |    |                   |    |                   |    |                   |     |                   |       |
|-------------------------------------------------------------|----|-------------------|----|-------------------|----|-------------------|-----|-------------------|-------|
| Weniger als eine Woche                                      | 8  | 9,8 <sup>a</sup>  | 4  | 12,9 <sup>a</sup> | 10 | 16,9 <sup>a</sup> | 22  | 12,8 <sup>a</sup> | 0,451 |
| Eine bis zwei Wochen                                        | 30 | 36,6 <sup>a</sup> | 15 | 48,4 <sup>a</sup> | 17 | 28,8 <sup>a</sup> | 62  | 36,0 <sup>a</sup> | 0,183 |
| Zwei bis drei Wochen                                        | 23 | 28,0 <sup>a</sup> | 5  | 16,1 <sup>a</sup> | 11 | 18,6 <sup>a</sup> | 39  | 22,7 <sup>a</sup> | 0,265 |
| Drei bis vier Wochen                                        | 10 | 12,2 <sup>a</sup> | 5  | 16,1 <sup>a</sup> | 8  | 13,6 <sup>a</sup> | 23  | 13,4 <sup>a</sup> | 0,859 |
| Mehr als vier Wochen                                        | 8  | 9,8 <sup>a</sup>  | 1  | 3,2 <sup>a</sup>  | 9  | 15,3 <sup>a</sup> | 18  | 10,5 <sup>a</sup> | 0,200 |
| Asymptomatisch                                              | 3  | 3,7 <sup>a</sup>  | 1  | 3,2 <sup>a</sup>  | 4  | 6,8 <sup>a</sup>  | 8   | 4,7 <sup>a</sup>  | 0,629 |
| Insgesamt                                                   | 82 | 97,6              | 31 | 96,9              | 59 | 95,2              | 172 | 96,6              |       |
| <b>Persistierende COVID-19-Symptome<sup>b</sup></b>         |    |                   |    |                   |    |                   |     |                   | 0,108 |
| Ja, mit Arbeitsunfähigkeit                                  | 1  | 1,3 <sup>a</sup>  | 0  | 0,0 <sup>a</sup>  | 1  | 1,8 <sup>a</sup>  | 2   | 1,2 <sup>a</sup>  | 0,774 |
| Anhaltende Symptome im Zusammenhang mit COVID-19            | 20 | 25,6 <sup>a</sup> | 3  | 10,0 <sup>a</sup> | 14 | 24,6 <sup>a</sup> | 37  | 22,4 <sup>a</sup> | 0,194 |
| Leichte Symptome mit verminderter Leistungsfähigkeit        | 21 | 26,9 <sup>a</sup> | 4  | 13,3 <sup>a</sup> | 6  | 10,5 <sup>a</sup> | 31  | 18,8 <sup>a</sup> | 0,038 |
| Erhöhte psychische Belastung durch die Infektion            | 15 | 19,2 <sup>a</sup> | 4  | 13,3 <sup>a</sup> | 3  | 5,3 <sup>a</sup>  | 22  | 13,3 <sup>a</sup> | 0,062 |
| Keine persistierenden Symptome und volle Leistungsfähigkeit | 43 | 55,1 <sup>a</sup> | 21 | 70,0 <sup>a</sup> | 38 | 66,7 <sup>a</sup> | 102 | 61,8 <sup>a</sup> | 0,235 |
| Insgesamt                                                   | 78 | 92,2              | 30 | 93,8              | 57 | 91,9              | 165 | 92,7              |       |
| <b>Transmission von SARS-CoV-2</b>                          |    |                   |    |                   |    |                   |     |                   | 0,269 |
| Potenziell eine andere Person infiziert                     | 31 | 42,5 <sup>a</sup> | 8  | 26,7 <sup>a</sup> | 19 | 33,3 <sup>a</sup> | 58  | 36,3 <sup>o</sup> | 0,760 |
| Potenziell Patient/-innen infiziert                         | 7  | 9,6 <sup>a</sup>  | 1  | 3,3 <sup>a</sup>  | 3  | 5,3 <sup>a</sup>  | 11  | 6,9 <sup>a</sup>  | 0,436 |
| Potenziell Kolleg/-innen infiziert                          | 9  | 12,3 <sup>a</sup> | 1  | 3,3 <sup>a</sup>  | 5  | 8,8 <sup>a</sup>  | 15  | 9,4 <sup>a</sup>  | 0,356 |
| Potenziell Person im Haushalt infiziert                     | 21 | 28,8 <sup>a</sup> | 6  | 20,0 <sup>a</sup> | 14 | 24,6 <sup>a</sup> | 41  | 25,6 <sup>a</sup> | 0,634 |

|                                                                                 |    |                   |    |                   |    |                   |     |                   |       |
|---------------------------------------------------------------------------------|----|-------------------|----|-------------------|----|-------------------|-----|-------------------|-------|
| Potenziell Bekannte/-n infiziert                                                | 10 | 13,7 <sup>a</sup> | 4  | 13,3 <sup>a</sup> | 3  | 5,3 <sup>a</sup>  | 17  | 10,6 <sup>a</sup> | 0,261 |
| Keine Kenntnis, andere Person infiziert zu haben                                | 42 | 57,5 <sup>a</sup> | 22 | 73,3 <sup>a</sup> | 38 | 66,7 <sup>a</sup> | 102 | 63,7 <sup>a</sup> | 0,269 |
| Insgesamt                                                                       | 73 | 86,9              | 30 | 93,8              | 57 | 91,9              | 160 | 90,0              |       |
| <b>Faktoren die zu eigener Infektion beigetragen haben</b>                      |    |                   |    |                   |    |                   |     |                   | 0,157 |
| Annahme, sich nicht zu infizieren                                               | 11 | 16,4 <sup>a</sup> | 5  | 41,7 <sup>a</sup> | 9  | 29,0 <sup>a</sup> | 25  | 22,7 <sup>a</sup> | 0,097 |
| Unregelmäßige Verwendung von PSA <sup>c</sup>                                   | 9  | 13,4 <sup>a</sup> | 0  | 0,0 <sup>a</sup>  | 8  | 25,8 <sup>a</sup> | 17  | 15,5 <sup>a</sup> | 0,084 |
| Kurzzeitiger Verzicht auf PSA <sup>c</sup> bei risikoreichem Kontakt            | 6  | 9,0 <sup>a</sup>  | 0  | 0,0 <sup>a</sup>  | 0  | 0,0 <sup>a</sup>  | 6   | 5,5 <sup>a</sup>  | 0,130 |
| Geringe Verfügbarkeit von PSA <sup>c</sup>                                      | 29 | 43,3 <sup>a</sup> | 3  | 25,0 <sup>a</sup> | 10 | 32,3 <sup>a</sup> | 42  | 38,2 <sup>a</sup> | 0,353 |
| Mangel an adäquater PSA <sup>c</sup>                                            | 37 | 55,2 <sup>a</sup> | 2  | 16,7 <sup>a</sup> | 14 | 45,2 <sup>a</sup> | 53  | 48,2 <sup>a</sup> | 0,045 |
| Verwendung von defekter PSA <sup>c</sup>                                        | 3  | 4,5 <sup>a</sup>  | 1  | 8,3 <sup>a</sup>  | 1  | 3,2 <sup>a</sup>  | 5   | 4,5 <sup>a</sup>  | 0,770 |
| Wiederverwendung von Einmal-PSA <sup>c</sup>                                    | 22 | 32,8 <sup>a</sup> | 0  | 0,0 <sup>a</sup>  | 4  | 12,9 <sup>a</sup> | 26  | 23,6 <sup>a</sup> | 0,012 |
| Unzureichende Schulung zur Anwendung der PSA <sup>c</sup>                       | 11 | 16,4 <sup>a</sup> | 1  | 8,3 <sup>a</sup>  | 5  | 16,1 <sup>a</sup> | 17  | 15,5 <sup>a</sup> | 0,769 |
| Unzureichende Möglichkeiten für grundlegende Hygienemaßnahmen                   | 5  | 7,5 <sup>a</sup>  | 0  | 0,0 <sup>a</sup>  | 2  | 6,5 <sup>a</sup>  | 7   | 6,4 <sup>a</sup>  | 0,621 |
| Unzureichende Schulung in grundlegenden Hygienemaßnahmen                        | 6  | 9,0 <sup>a</sup>  | 0  | 0,0 <sup>a</sup>  | 4  | 12,9 <sup>a</sup> | 10  | 9,1 <sup>a</sup>  | 0,418 |
| Unzureichende Umstrukturierung von Prozessen und Räumlichkeiten am Arbeitsplatz | 27 | 40,3 <sup>a</sup> | 1  | 8,3 <sup>a</sup>  | 7  | 22,6 <sup>a</sup> | 35  | 31,8 <sup>a</sup> | 0,039 |
| Erhöhte arbeitsbedingte körperliche Erschöpfung                                 | 18 | 26,9 <sup>a</sup> | 4  | 33,3 <sup>a</sup> | 6  | 19,4 <sup>a</sup> | 28  | 25,5 <sup>a</sup> | 0,585 |

|                                                 |    |                   |    |                   |    |                   |     |                   |       |
|-------------------------------------------------|----|-------------------|----|-------------------|----|-------------------|-----|-------------------|-------|
| Erhöhte arbeitsbedingte psychische Erschöpfung  | 18 | 26,9 <sup>a</sup> | 4  | 33,3 <sup>a</sup> | 4  | 12,9 <sup>a</sup> | 26  | 23,6 <sup>a</sup> | 0,224 |
| Erhöhte psychische Belastung durch die Pandemie | 11 | 16,4 <sup>a</sup> | 2  | 16,7 <sup>a</sup> | 3  | 9,7 <sup>a</sup>  | 16  | 14,5 <sup>a</sup> | 0,663 |
| Unzureichende Arbeitsschutzmaßnahmen            | 26 | 38,8 <sup>a</sup> | 1  | 8,3 <sup>a</sup>  | 9  | 29,0 <sup>a</sup> | 36  | 32,7 <sup>a</sup> | 0,102 |
| Insgesamt                                       | 67 | 79,8              | 12 | 37,5              | 31 | 50,0              | 110 | 61,8              |       |

<sup>a</sup> berechnet auf der Grundlage gültiger Antworten

<sup>b</sup> zum Zeitpunkt der Datenerhebung, die Infektionen lagen je nach Person ein bis sechs Monate zurück

<sup>c</sup> Persönliche Schutzausrüstung
